# Supplementary material for: Characterisation of Candida parapsilosis CYP51 as a Drug Target Using Saccharomyces cerevisiae as Host
Source: MDPI journal article supplement (doi:10.3390/jof8010069), 2022-01-10
Supplement: s1 [file s1]

Table S1. *S. cerevisiae* parental strains used in the study

| Strain | Genotype                                                                                                                                                                                                                                                                           | Source               | Reference |
|--------|------------------------------------------------------------------------------------------------------------------------------------------------------------------------------------------------------------------------------------------------------------------------------------|----------------------|-----------|
| ADA    | MAT $\alpha$ PDR1-3 $\Delta$ YOR1::hisG $\Delta$ SNQ2::hisG $\Delta$ PDR3::hisG $\Delta$ PDR10::hisG $\Delta$ PDR11::hisG $\Delta$ YCF1::hisG $\Delta$ PDR55::hisG $\Delta$ PDR15::hisG $\Delta$ ura3 $\Delta$ hisAD124567 $\Delta$ PDR5::hisG $\Delta$ PDR15::hisG, $\Delta$ ura3 | Lamping et al, 2007  | [1]       |
| Y941   | ADA, $\Delta$ pdr5::ScCYP51-6xHIS-URA3                                                                                                                                                                                                                                             | Monk et al, 2014     | [2]       |
| Y1857  | AD2 $\Delta$ (ADA, $\Delta$ HIS1::dpl200)                                                                                                                                                                                                                                          | Sagatova et al, 2016 | [3]       |
| Y2411  | AD2 $\Delta$ , $\Delta$ PDR5::URA3                                                                                                                                                                                                                                                 | E. Lamping           |           |
| Y2494  | AD2 $\Delta$ , $\Delta$ CYP51pro::GAL1pro                                                                                                                                                                                                                                          | Monk et al, 2019     | [4]       |

Table S2. Oligonucleotides used in the study

|                                                                                                                |                             |                                                           |
|----------------------------------------------------------------------------------------------------------------|-----------------------------|-----------------------------------------------------------|
| <b>A. Construction of CpCYP51-6xHis Y132F cassette by 3-fragment fusion for expression from the PDR5 locus</b> |                             |                                                           |
| 1. Amplification of CpCYP51-6xHis Y132F ORF from plasmids received from ATUM                                   |                             |                                                           |
| Forward primer                                                                                                 | PDR5us-CpCYP51 Y132F_f (52) | CCGCTCGTTCGAAAGACTTAATTAATAATGG<br>CTTTGGTGGACTTGGCGTTG   |
| Reverse primer                                                                                                 | 6 HisStop_r (26)            | CGAATTTAATGATGATGGTGATGATG                                |
| 2. Amplification of upstream fragments from gDNA of selected strain                                            |                             |                                                           |
| Forward primer                                                                                                 | PDR5Fv3_f (23)              | TCGCATTCTGCGCCTTCGAGCAC                                   |
| Reverse primer                                                                                                 | pABC3-PacI_r (31)           | CATTTTTTAATTAAGTCTTTCGAACGAGCGG                           |
| 3. Amplification of downstream fragment from gDNA of selected strain                                           |                             |                                                           |
| Forward primer                                                                                                 | 6HisStop-f (26)             | CATCATCACCATCATCATTAATTCG                                 |
| Reverse primer                                                                                                 | PDR5_186DS_r (25)           | TTCGGACATTGAACTTTGATTTATC                                 |
| <b>B. For wild type strain construct reversion</b>                                                             |                             |                                                           |
| Forward primer                                                                                                 | CpCyp51_Y132_f (31)         | GTAAAGGTGTGATCTACGATTGTCCTAACGC                           |
| Reverse primer                                                                                                 | CpCyp51_Y132_r (31)         | GCGTTAGGACAATCGTAGATCACACCTTTAC                           |
| <b>C. Construction of CpCPR-6xHis cassette by 3-fragment fusion for expression from the PDR15 locus</b>        |                             |                                                           |
| 1. Amplification of CpCPR-6xHis ORF from plasmids received from ATUM                                           |                             |                                                           |
| Forward primer                                                                                                 | PDR5us-CpCPR (54)           | CCGCTCGTTCGAAAGACTTAATTAATAATGG<br>CTTTAGATAGACTAGATCTTAC |
| Reverse primer                                                                                                 | 6 HisStop -r (26)           |                                                           |
| 2. Amplification of upstream fragments from gDNA of selected strain                                            |                             |                                                           |
| Forward primer                                                                                                 | PDR15us_f (25)              | GTCACGCCGCCGAACGACGCGCGC                                  |
| Reverse primer                                                                                                 | pABC3-PacI_r (31)           | CATTTTTTAATTAAGTCTTTCGAACGAGCGG                           |
| 3. Amplification of downstream fragment from gDNA of selected strain                                           |                             |                                                           |
| Forward primer                                                                                                 | Not1-6xHis (34)             | GGCGGCCGCCATCATCACCATCATCATTAAT<br>TC                     |
| Reverse primer                                                                                                 | PDR15DS_r (25)              | GATGGAATAATCCAGTTCGACTCTG                                 |
| <b>D. Amplification of SchIS1 disruption cassette from gDNA of selected strains</b>                            |                             |                                                           |

|                |                       |                           |
|----------------|-----------------------|---------------------------|
| Forward primer | ScErg11_US-773_f (24) | GCAACAATGGGCGGTTGTTTAGAG  |
| Reverse primer | ScErg11DS346_r (25)   | GACTGCTTTATTTCtGCTTGGCCTG |

\*f and r denotes forward and reverse primer respectively. Number of nucleotides is shown in brackets.

Table S3. MIC<sub>80</sub> values for strains overexpressing CpCYP51, CpCYP51 Y132F with/without CpCPR

| Strains      | MIC <sub>80</sub> |                |                |               |                 |                 |               |                    |
|--------------|-------------------|----------------|----------------|---------------|-----------------|-----------------|---------------|--------------------|
|              | FLC<br>( $\mu$ M) | VCZ<br>(nM)    | ITC<br>(nM)    | PCZ<br>(nM)   | VT-1161<br>(nM) | VT-1129<br>(nM) | MCF<br>(nM)   | AmpB<br>( $\mu$ M) |
| <b>Y2411</b> | 2.4 $\pm$ 0.08    | 41.7 $\pm$ 1.6 | 128 $\pm$ 12   | 157 $\pm$ 3.4 | 27.1 $\pm$ 0.5  | 26.7 $\pm$ 0.2  | 212 $\pm$ 15  | 2.69 $\pm$ 0.2     |
| <b>Y2718</b> | 4.2 $\pm$ 0.4     | 104 $\pm$ 7.5  | 187 $\pm$ 16   | 253 $\pm$ 48  | 58 $\pm$ 6.1    | 51.3 $\pm$ 10   | 288 $\pm$ 31  | 2.24 $\pm$ 0.13    |
| <b>Y2719</b> | 4.65 $\pm$ 0.13   | 131 $\pm$ 3.6  | 222 $\pm$ 16   | 188 $\pm$ 9.6 | 58 $\pm$ 8      | 41.6 $\pm$ 3.5  | 263 $\pm$ 18  | 2.74 $\pm$ 0.08    |
| <b>Y2720</b> | 6.67 $\pm$ 0.09   | 146 $\pm$ 8.3  | 213 $\pm$ 18   | 283 $\pm$ 21  | 84.7 $\pm$ 8    | 56.5 $\pm$ 6.5  | 247 $\pm$ 3.0 | 2.58 $\pm$ 0.03    |
| <b>Y2721</b> | 4.97 $\pm$ 0.03   | 121 $\pm$ 2.03 | 291 $\pm$ 3.3  | 229 $\pm$ 3.5 | 46.8 $\pm$ 2    | 47.5 $\pm$ 8.8  | 237 $\pm$ 1.5 | 2.77 $\pm$ 0.05    |
| <b>Y2713</b> | 38.2 $\pm$ 3.4    | 1280 $\pm$ 81  | 202 $\pm$ 1.4  | 164 $\pm$ 4.7 | 199 $\pm$ 5.4   | 264 $\pm$ 24    | 237 $\pm$ 3.2 | 2.8 $\pm$ 0.02     |
| <b>Y2714</b> | 47.2 $\pm$ 5.8    | 1820 $\pm$ 18  | 207 $\pm$ 3.6  | 242 $\pm$ 17  | 277 $\pm$ 8.1   | 367 $\pm$ 16    | 280 $\pm$ 1.5 | 2.09 $\pm$ 0.2     |
| <b>Y2715</b> | 50 $\pm$ 2.8      | 1540 $\pm$ 44  | 201 $\pm$ 0.7  | 179 $\pm$ 0.5 | 222 $\pm$ 20    | 299 $\pm$ 21    | 184 $\pm$ 16  | 3.38 $\pm$ 0.3     |
| <b>Y2716</b> | 49 $\pm$ 0.01     | 1410 $\pm$ 20  | 202 $\pm$ 0.13 | 228 $\pm$ 25  | 295 $\pm$ 3.8   | 293 $\pm$ 5.2   | 205 $\pm$ 0.9 | 2.9 $\pm$ 0.2      |

MIC<sub>80</sub>s are shown as the mean values  $\pm$  SEM for 3 separate clones of each strain using data obtained in triplicate measurements from at least 3 different experiments (a total of 9 measurements per strain).

Table S4. Data collection and refinement statistics for ScCYP51-6×His in complex with VT-1129

|                                   |                          |
|-----------------------------------|--------------------------|
| <b>Protein</b>                    | ScCYP51-6×His            |
| <b>Ligand</b>                     | VT-1129                  |
| <b>PDB ID</b>                     | 7RYX                     |
| <b><u>Data collection</u></b>     |                          |
| Diffraction source                | MX2                      |
| Wavelength (Å)                    | 0.9537                   |
| Space group                       | P 1 2 <sub>1</sub> 1     |
| Cell dimensions                   |                          |
| a, b, c (Å)                       | 78.4, 67.98, 80.3        |
| $\alpha$ , $\beta$ , $\gamma$ (°) | 90, 99.38, 90            |
| Total reflections                 | 279113                   |
| Unique reflections                | 48767                    |
| Resolution (Å)                    | 2.1 - 45.19 (2.16- 2.10) |
| R <sub>merge</sub>                | 0.086 (0.720)            |
| I / $\sigma$ I                    | 8.6 (1.7)                |
| Completeness (%)                  | 99.8 (99.9)              |
| Redundancy                        | 5.7 (6.0)                |
| CC <sub>1/2</sub>                 | 0.996 (0.893)            |
| <b><u>Refinement</u></b>          |                          |
| Resolution (Å)                    | 2.1                      |
| No. reflections                   | 48681                    |
| Rwork / Rfree                     | 0.2336/0.2684            |
| No. of atoms                      |                          |
| Protein                           | 4271                     |
| Ligand/ion                        | 79                       |
| Water                             | 41                       |
| B-factors (Å <sup>2</sup> )       |                          |
| Protein                           | 61.69                    |
| Ligand/ion                        | 49.68                    |
| Water                             | 52.63                    |
| R.m.s. deviations                 |                          |
| Bond lengths (Å)                  | 0.008                    |
| Bond angles (°)                   | 0.94                     |
| Ramachandran favored (%)          | 95.44                    |
| Ramachandran allowed (%)          | 3.99                     |
| Ramachandran outliers (%)         | 0.57                     |
| Rotamer outliers (%)              | 0.65                     |
| Clashscore                        | 5.79                     |

## A. Mass spectrometry result of CpCYP51-6×His

### Digestion of CpCYP51-6×His with trypsin

MALVDLALHGNYFM<sup>1</sup>TLSTLQQFGLLVFAPFIYNI<sup>2</sup>IWQLLYSLRKDRVPLVFYWI<sup>3</sup>PWVGS<sup>4</sup>AVSYGQDPYGF<sup>5</sup>FEQCREKYGD<sup>6</sup>LF  
SFVMLGRVMTVYLGPKGHEFVFN<sup>7</sup>AKLSDVSAEDAYQHL<sup>8</sup>TTPVFGKGV<sup>9</sup>IYDCPNARLMEQKKFAKTAL<sup>10</sup>TDSFRRYVPLIRGE<sup>11</sup>I  
LDYFTKSKVFNMKKQKSGVVDVLQSQPEITIFTASRSL<sup>12</sup>GEAMRKRFDASFAQLYADLDKGFT<sup>13</sup>PINFVFPHLPLPHYWKRDA<sup>14</sup>A  
QQKISETYMTEIARRRETGDIDENRDLIDSLLVNSTYKDGVKMTDQEIANLLIGVLMGGQHTSATTSAWFL<sup>15</sup>LLHAEKPQLQDE  
LYQEVNLALSGKGGNDDLSYEDLQQMPLVNNTIKETLR<sup>16</sup>LHMLHSIFRKVVSPLVVPNTKYIVPRGHHVLVSPGYAHTNERF  
YKDASDFNPHRWDESASTNDAGEVDYGF<sup>17</sup>GKVSKGVSSSYLPF<sup>18</sup>GGGRHRCIGE<sup>19</sup>QFAYVQLGTIL<sup>20</sup>TTFVYNLKWKL<sup>21</sup>ANGKVPD<sup>22</sup>VD  
YTSMTVTL<sup>23</sup>PQH<sup>24</sup>PAEIVWEKRDTCVIGGRHHHHHH

Protein sequence coverage is 67.8%

### Digestion of CpCYP51-6×His with chymotrypsin

MALVDLALHGNYFM<sup>1</sup>TLSTLQQFGLLVFAPFIYNI<sup>2</sup>IWQLLYSLRKDRVPLVFYWI<sup>3</sup>PWVGS<sup>4</sup>AVSYGQDPYGF<sup>5</sup>FEQCREKYGD<sup>6</sup>LF  
SFVMLGRVMTVYLGPKGHEFVFN<sup>7</sup>AKLSDVSAEDAYQHL<sup>8</sup>TTPVFGKGV<sup>9</sup>IYDCPNARLMEQKKFAKTAL<sup>10</sup>TDSFRRYVPLIRGE<sup>11</sup>I  
LDYFTKSKVFNMKKQKSGVVDVLQSQPEITIFTASRSL<sup>12</sup>GEAMRKRFDASFAQLYADLDKGFT<sup>13</sup>PINFVFPHLPLPHYWKRDA<sup>14</sup>A  
QQKISETYMTEIARRRETGDIDENRDLIDSLLVNSTYKDGVKMTDQEIANLLIGVLMGGQHTSATTSAWFL<sup>15</sup>LLHAEKPQLQDE  
LYQEVNLALSGKGGNDDLSYEDLQQMPLVNNTIKETLR<sup>16</sup>LHMLHSIFRKVVSPLVVPNTKYIVPRGHHVLVSPGYAHTNERF  
YKDASDFNPHRWDESASTNDAGEVDYGF<sup>17</sup>GKVSKGVSSSYLPF<sup>18</sup>GGGRHRCIGE<sup>19</sup>QFAYVQLGTIL<sup>20</sup>TTFVYNLKWKL<sup>21</sup>ANGKVPD<sup>22</sup>VD  
YTSMTVTL<sup>23</sup>PQH<sup>24</sup>PAEIVWEKRDTCVIGGRHHHHHH

Protein sequence coverage is 88.32%

## B. Mass spectrometry result of CpCYP51-6×His Y132F

Digestion of CpCYP51-6×His Y132F with trypsin. (The 'F' substitution at the 132 position is highlighted in red).

MALVDLALHGNYFM<sup>1</sup>TLSTLQQFGLLVFAPFIYNI<sup>2</sup>IWQLLYSLRKDRVPLVFYWI<sup>3</sup>PWVGS<sup>4</sup>AVSYGQDPYGF<sup>5</sup>FEQCREKYGD<sup>6</sup>LF  
SFVMLGRVMTVYLGPKGHEFVFN<sup>7</sup>AKLSDVSAEDAYQHL<sup>8</sup>TTPVFGKGV<sup>9</sup>I<sup>10</sup>DCPNARLMEQKKFAKTAL<sup>11</sup>TDSFRRYVPLIRGE<sup>12</sup>I  
LDYFTKSKVFNMKKQKSGVVDVLQSQPEITIFTASRSL<sup>13</sup>GEAMRKRFDASFAQLYADLDKGFT<sup>14</sup>PINFVFPHLPLPHYWKRDA<sup>15</sup>A  
QQKISETYMTEIARRRETGDIDENRDLIDSLLVNSTYKDGVKMTDQEIANLLIGVLMGGQHTSATTSAWFL<sup>16</sup>LLHAEKPQLQDE  
LYQEVNLALSGKGGNDDLSYEDLQQMPLVNNTIKETLR<sup>17</sup>LHMLHSIFRKVVSPLVVPNTKYIVPRGHHVLVSPGYAHTNERF  
YKDASDFNPHRWDESASTNDAGEVDYGF<sup>18</sup>GKVSKGVSSSYLPF<sup>19</sup>GGGRHRCIGE<sup>20</sup>QFAYVQLGTIL<sup>21</sup>TTFVYNLKWKL<sup>22</sup>ANGKVPD<sup>23</sup>VD  
YTSMTVTL<sup>24</sup>PQH<sup>25</sup>PAEIVWEKRDTCVIGGRHHHHHH

Protein sequence coverage is 63.09%

Digestion of CpCYP51-6×His Y132F with chymotrypsin. (The 'F' substitution at the 132 position is highlighted in red).

MALVDLALHGNYFM<sup>1</sup>TLSTLQQFGLLVFAPFIYNI<sup>2</sup>IWQLLYSLRKDRVPLVFYWI<sup>3</sup>PWVGS<sup>4</sup>AVSYGQDPYGF<sup>5</sup>FEQCREKYGD<sup>6</sup>LF  
SFVMLGRVMTVYLGPKGHEFVFN<sup>7</sup>AKLSDVSAEDAYQHL<sup>8</sup>TTPVFGKGV<sup>9</sup>I<sup>10</sup>DCPNARLMEQKKFAKTAL<sup>11</sup>TDSFRRYVPLIRGE<sup>12</sup>I  
LDYFTKSKVFNMKKQKSGVVDVLQSQPEITIFTASRSL<sup>13</sup>GEAMRKRFDASFAQLYADLDKGFT<sup>14</sup>PINFVFPHLPLPHYWKRDA<sup>15</sup>A  
QQKISETYMTEIARRRETGDIDENRDLIDSLLVNSTYKDGVKMTDQEIANLLIGVLMGGQHTSATTSAWFL<sup>16</sup>LLHAEKPQLQDE  
LYQEVNLALSGKGGNDDLSYEDLQQMPLVNNTIKETLR<sup>17</sup>LHMLHSIFRKVVSPLVVPNTKYIVPRGHHVLVSPGYAHTNERF  
YKDASDFNPHRWDESASTNDAGEVDYGF<sup>18</sup>GKVSKGVSSSYLPF<sup>19</sup>GGGRHRCIGE<sup>20</sup>QFAYVQLGTIL<sup>21</sup>TTFVYNLKWKL<sup>22</sup>ANGKVPD<sup>23</sup>VD  
YTSMTVTL<sup>24</sup>PQH<sup>25</sup>PAEIVWEKRDTCVIGGRHHHHHH

Protein sequence coverage is 93.97%

## C. Mass spectrometry result of CpCPR-6×His

### Digestion of CpCPR-6×His with trypsin.

MALDRDLTLVVIVLAVAVAAAYFIKSQYFSKPESSEGLNTDTAGGNSRDILATLTKNHKNTLLLFSGQTGTAEDYCNKMSRELS  
 ARFGLKTMVADFADYDWDNFGDIKEDVLVFFIMATYGEGETDNAIEFVDFLDNEADTLSTLRFTVFGLGNSTYEFFNAIGRK  
 INEKLESKGAERFAEYEGEDDGQGTMDDEDFLAWKDGVFDSLNNLNLEEKELKYEPSLKLEIRDDLTIDSSVSLGEPDKSYV  
 NTKAGTDLTKGPFHDHSHPYLAPITKIKELFFTKERSCVHVEFDLSNSNLKYTTGDHLAIWPSNANEYVELFLKTFDLTEQRDV  
 VFDLKALDSTYQIPFPPTITYEAVVRHHLEISGPVSRQFFLSIAAFAPDEETKTKLTTVANDKQKYAAEVTHKKYNIADGLLY  
 FSNGKPWTKVPFEFLIENVQHFTPRYYSISSSSLSEKTHIDITAVVEAETESDGRVVTGVVTNLLKDVEINKNSSDDKPIVS  
 DLKGPRNKFQNYKLPVHVRSTFKLPSSSKTPIILVGPGTGVAPLRGFVRERVQQLKNGVNVGPSLLFYGCRNEDEDYLYRDE  
 WPQYAKELGESFELITAFSRANPNKKVYVQHKILEQAKKINQLLQDGGIIYVCGDASHMARDVQASFAKVLSQERGIELEKAA  
 ELIRSLKVQNRQEDVWGRHHHHH

Protein sequence coverage is 90.14%.

Digestion of CpCPR-6×His with chymotrypsin.

MALDRDLTLVVIVLAVAVAAAYFIKSQYFSKPESSEGLNTDTAGGNSRDILATLTKNHKNTLLLFSGQTGTAEDYCNKMSRELS  
 ARFGLKTMVADFADYDWDNFGDIKEDVLVFFIMATYGEGETDNAIEFVDFLDNEADTLSTLRFTVFGLGNSTYEFFNAIGRK  
 INEKLESKGAERFAEYEGEDDGQGTMDDEDFLAWKDGVFDSLNNLNLEEKELKYEPSLKLEIRDDLTIDSSVSLGEPDKSYV  
 NTKAGTDLTKGPFHDHSHPYLAPITKIKELFFTKERSCVHVEFDLSNSNLKYTTGDHLAIWPSNANEYVELFLKTFDLTEQRDV  
 VFDLKALDSTYQIPFPPTITYEAVVRHHLEISGPVSRQFFLSIAAFAPDEETKTKLTTVANDKQKYAAEVTHKKYNIADGLLY  
 FSNGKPWTKVPFEFLIENVQHFTPRYYSISSSSLSEKTHIDITAVVEAETESDGRVVTGVVTNLLKDVEINKNSSDDKPIVS  
 DLKGPRNKFQNYKLPVHVRSTFKLPSSSKTPIILVGPGTGVAPLRGFVRERVQQLKNGVNVGPSLLFYGCRNEDEDYLYRDE  
 WPQYAKELGESFELITAFSRANPNKKVYVQHKILEQAKKINQLLQDGGIIYVCGDASHMARDVQASFAKVLSQERGIELEKAA  
 ELIRSLKVQNRQEDVWGRHHHHH

Protein sequence coverage is 94.49%

Figure S1 Identification of the recombinant proteins by mass spectrometry. Sequences identified on excision from SDS-PAGE gel bands are highlighted in grey.

## References

1. Lamping E, Monk BC, Niimi K, Holmes AR, Tsao S, Tanabe K, et al. Characterization of three classes of membrane proteins involved in fungal azole resistance by functional hyperexpression in *Saccharomyces cerevisiae*. *Eukaryot Cell*. 2007;6:1150-65.
2. Monk BC, Tomasiak TM, Keniya MV, Huschmann FU, Tyndall JD, O'Connell JD, 3rd, et al. Architecture of a single membrane spanning cytochrome P450 suggests constraints that orient the catalytic domain relative to a bilayer. *Proc Natl Acad Sci U S A*. 2014;111:3865-70.
3. Sagatova AA, Keniya MV, Wilson RK, Sabherwal M, Tyndall JD, Monk BC. Triazole resistance mediated by mutations of a conserved active site tyrosine in fungal lanosterol 14alpha-demethylase. *Sci Rep*. 2016;6:26213.
4. Monk BC, Keniya MV, Sabherwal M, Wilson RK, Graham DO, Hassan HF, et al. Azole Resistance Reduces Susceptibility to the Tetrazole Antifungal VT-1161. *Antimicrob Agents Chemother*. 2019;63:e02114-18.
